# Supplementary material for: Structural basis of dynamic P5CS filaments
Source: eLife. 2022 Mar 14;11:e76107. doi: 10.7554/eLife.76107 (PMC8963878; doi:10.7554/eLife.76107)
Supplement: Figure 5—source data 1. [file elife-76107-fig5-data1.xlsx]

## Sheet: WT
Time/min	A340	A340	A340	0-1	0-2	0-3	Δ[NADPH]/μM	Δ[NADPH]/μM	Δ[NADPH]/μM
0	1.3496	1.2594	1.2756	1.3496	1.2594	1.2756	0	0	0
0.5	1.3304	1.2251	1.2483	1.3496	1.2594	1.2756	7.85818	14.0383	11.1733
1	1.3064	1.1973	1.2232	1.3496	1.2594	1.2756	17.6809	25.4163	21.4463
1.5	1.2808	1.1688	1.2014	1.3496	1.2594	1.2756	28.1585	37.0808	30.3686
2	1.2576	1.1411	1.1779	1.3496	1.2594	1.2756	37.6538	48.4178	39.9867
2.5	1.2311	1.1157	1.1543	1.3496	1.2594	1.2756	48.4997	58.8135	49.6457
3	1.2066	1.0916	1.1318	1.3496	1.2594	1.2756	58.527	68.6772	58.8545
3.5	1.1821	1.0645	1.1101	1.3496	1.2594	1.2756	68.5544	79.7687	67.7358
4	1.1578	1.041	1.0877	1.3496	1.2594	1.2756	78.4999	89.3868	76.9037
4.5	1.1378	1.0157	1.0654	1.3496	1.2594	1.2756	86.6855	99.7415	86.0307
5	1.115	0.9932	1.0428	1.3496	1.2594	1.2756	96.0171	108.95	95.2804
5.5	1.0945	0.9707	1.0214	1.3496	1.2594	1.2756	104.407	118.159	104.039
6	1.073	0.9475	0.9996	1.3496	1.2594	1.2756	113.207	127.654	112.961
6.5	1.0534	0.926	0.9791	1.3496	1.2594	1.2756	121.229	136.454	121.352
7	1.0336	0.9043	0.9584	1.3496	1.2594	1.2756	129.332	145.335	129.824
7.5	1.0138	0.8844	0.9393	1.3496	1.2594	1.2756	137.436	153.48	137.641
8	0.9943	0.8644	0.9212	1.3496	1.2594	1.2756	145.417	161.666	145.049
8.5	0.9749	0.8452	0.9022	1.3496	1.2594	1.2756	153.357	169.524	152.825
9	0.9568	0.8257	0.8841	1.3496	1.2594	1.2756	160.765	177.505	160.233
9.5	0.9369	0.8069	0.8654	1.3496	1.2594	1.2756	168.91	185.199	167.887
10	0.9191	0.7882	0.8484	1.3496	1.2594	1.2756	176.195	192.853	174.844

## Sheet: R124A
Time/min	A340	A340	A340	0-1	0-2	0-3	Δ[NADPH]/μM	Δ[NADPH]/μM	Δ[NADPH]/μM
0	1.112	1.2465	1.3027	1.112	1.2465	1.3027	0	0	0
0.5	1.104	1.2385	1.2979	1.112	1.2465	1.3027	3.27424	3.27424	1.96454
1	1.0934	1.2341	1.2866	1.112	1.2465	1.3027	7.61261	5.07507	6.58941
1.5	1.0881	1.2263	1.2814	1.112	1.2465	1.3027	9.78179	8.26746	8.71766
2	1.0818	1.2179	1.2783	1.112	1.2465	1.3027	12.3603	11.7054	9.98643
2.5	1.076	1.2113	1.2748	1.112	1.2465	1.3027	14.7341	14.4067	11.4189
3	1.0698	1.2086	1.2702	1.112	1.2465	1.3027	17.2716	15.5117	13.3016
3.5	1.0626	1.2018	1.2614	1.112	1.2465	1.3027	20.2184	18.2948	16.9033
4	1.0563	1.1978	1.2563	1.112	1.2465	1.3027	22.7969	19.9319	18.9906
4.5	1.0502	1.191	1.2503	1.112	1.2465	1.3027	25.2935	22.715	21.4463
5	1.0438	1.1843	1.2439	1.112	1.2465	1.3027	27.9129	25.4572	24.0657
5.5	1.0377	1.1773	1.2354	1.112	1.2465	1.3027	30.4095	28.3222	27.5445
6	1.0308	1.1699	1.2309	1.112	1.2465	1.3027	33.2335	31.3508	29.3863
6.5	1.0251	1.1648	1.2254	1.112	1.2465	1.3027	35.5664	33.4382	31.6373
7	1.0186	1.157	1.2172	1.112	1.2465	1.3027	38.2268	36.6306	34.9934
7.5	1.0139	1.1507	1.2086	1.112	1.2465	1.3027	40.1504	39.209	38.5132
8	1.0087	1.1449	1.2018	1.112	1.2465	1.3027	42.2786	41.5828	41.2964
8.5	1.0027	1.1374	1.1995	1.112	1.2465	1.3027	44.7343	44.6524	42.2377
9	0.9966	1.1316	1.1934	1.112	1.2465	1.3027	47.2309	47.0263	44.7343
9.5	0.9915	1.1252	1.1878	1.112	1.2465	1.3027	49.3182	49.6457	47.0263
10	0.9856	1.1202	1.1828	1.112	1.2465	1.3027	51.733	51.6921	49.0727

## Sheet: F642A
Time/min	A340	A340	A340	0-1	0-2	0-3	Δ[NADPH]/μM	Δ[NADPH]/μM	Δ[NADPH]/μM
0	1.2402	1.2016	1.2235	1.2402	1.2016	1.2235	0	0	0
0.5	1.2338	1.1929	1.2166	1.2402	1.2016	1.2235	2.61939	3.56074	2.82403
1	1.2281	1.189	1.2072	1.2402	1.2016	1.2235	4.95229	5.15693	6.67126
1.5	1.2223	1.1856	1.2043	1.2402	1.2016	1.2235	7.32611	6.54848	7.85818
2	1.2215	1.1828	1.2015	1.2402	1.2016	1.2235	7.65354	7.69446	9.00416
2.5	1.2199	1.1821	1.1985	1.2402	1.2016	1.2235	8.30838	7.98096	10.232
3	1.22	1.1803	1.1972	1.2402	1.2016	1.2235	8.26746	8.71766	10.7641
3.5	1.219	1.1791	1.1958	1.2402	1.2016	1.2235	8.67674	9.2088	11.3371
4	1.2198	1.1776	1.1943	1.2402	1.2016	1.2235	8.34931	9.82272	11.951
4.5	1.219	1.1773	1.193	1.2402	1.2016	1.2235	8.67674	9.9455	12.483
5	1.2176	1.1756	1.1912	1.2402	1.2016	1.2235	9.24973	10.6413	13.2197
5.5	1.2162	1.1744	1.1916	1.2402	1.2016	1.2235	9.82272	11.1324	13.056
6	1.2158	1.1741	1.1894	1.2402	1.2016	1.2235	9.98643	11.2552	13.9564
6.5	1.2141	1.1731	1.1884	1.2402	1.2016	1.2235	10.6822	11.6645	14.3657
7	1.2143	1.1728	1.1875	1.2402	1.2016	1.2235	10.6004	11.7873	14.7341
7.5	1.2131	1.1708	1.186	1.2402	1.2016	1.2235	11.0915	12.6058	15.348
8	1.2132	1.1698	1.1848	1.2402	1.2016	1.2235	11.0506	13.0151	15.8391
8.5	1.2114	1.1681	1.1841	1.2402	1.2016	1.2235	11.7873	13.7109	16.1256
9	1.21	1.1683	1.1832	1.2402	1.2016	1.2235	12.3603	13.629	16.494
9.5	1.2088	1.168	1.1817	1.2402	1.2016	1.2235	12.8514	13.7518	17.1079
10	1.208	1.166	1.1814	1.2402	1.2016	1.2235	13.1788	14.5704	17.2307

## Sheet: Control
Time/min	A340	A340	A340	0-1	0-2	0-3	Δ[NADPH]/μM	Δ[NADPH]/μM	Δ[NADPH]/μM
0	1.2719	1.3638	1.3021	1.2719	1.3638	1.3021	0	0	0
0.5	1.271	1.3679	1.3026	1.2719	1.3638	1.3021	0.368352	-1.67805	-0.20464
1	1.2712	1.3664	1.302	1.2719	1.3638	1.3021	0.286496	-1.06413	0.040928
1.5	1.2722	1.3655	1.3009	1.2719	1.3638	1.3021	-0.122784	-0.695776	0.491136
2	1.271	1.3644	1.3006	1.2719	1.3638	1.3021	0.368352	-0.245568	0.61392
2.5	1.2736	1.3668	1.3014	1.2719	1.3638	1.3021	-0.695776	-1.22784	0.286496
3	1.2706	1.3638	1.2986	1.2719	1.3638	1.3021	0.532064	0	1.43248
3.5	1.2703	1.3643	1.3011	1.2719	1.3638	1.3021	0.654848	-0.20464	0.40928
4	1.2682	1.3634	1.2986	1.2719	1.3638	1.3021	1.51434	0.163712	1.43248
4.5	1.27	1.3646	1.2983	1.2719	1.3638	1.3021	0.777632	-0.327424	1.55526
5	1.2679	1.3633	1.2974	1.2719	1.3638	1.3021	1.63712	0.20464	1.92362
5.5	1.2689	1.3613	1.2982	1.2719	1.3638	1.3021	1.22784	1.0232	1.59619
6	1.268	1.3628	1.295	1.2719	1.3638	1.3021	1.59619	0.40928	2.90589
6.5	1.2689	1.3614	1.2975	1.2719	1.3638	1.3021	1.22784	0.982272	1.88269
7	1.266	1.3621	1.2968	1.2719	1.3638	1.3021	2.41475	0.695776	2.16918
7.5	1.2672	1.3619	1.2966	1.2719	1.3638	1.3021	1.92362	0.777632	2.25104
8	1.2691	1.3636	1.2958	1.2719	1.3638	1.3021	1.14598	0.081856	2.57846
8.5	1.2673	1.3598	1.2969	1.2719	1.3638	1.3021	1.88269	1.63712	2.12826
9	1.2661	1.3587	1.2958	1.2719	1.3638	1.3021	2.37382	2.08733	2.57846
9.5	1.267	1.3592	1.2944	1.2719	1.3638	1.3021	2.00547	1.88269	3.15146
10	1.2677	1.3563	1.2952	1.2719	1.3638	1.3021	1.71898	3.0696	2.82403
